# Supplementary material for: Resting-state alterations in behavioral variant frontotemporal dementia are related to the distribution of monoamine and GABA neurotransmitter systems
Source: eLife. 2024 Jan 15;13:e86085. doi: 10.7554/eLife.86085 (PMC10789488; doi:10.7554/eLife.86085)
Supplement: Figure 1—figure supplement 2—source data 1. [file elife-86085-fig1-figsupp2-data1.xlsx]

## Sheet: Figure 1-figure supplement 1
Eigenvariates of largest cluster (HC>bvFTD) for fALFF and GMV)
Group	Eigenvariate fALFF	Eigenvariate GMV
Patient	0.378004	0.352111
Patient	0.368352	0.376746
Patient	0.319745	0.385772
Patient	0.344018	0.428521
Patient	0.432832	0.378166
Patient	0.396138	0.316482
Patient	0.369101	0.352447
Patient	0.293531	0.284253
Patient	0.37124	0.298804
Patient	0.280427	0.209835
Patient	0.282892	0.356301
Patient	0.380168	0.354197
Patient	0.433358	0.38148
Patient	0.416636	0.437359
Patient	0.415506	0.415604
Patient	0.316547	0.261161
Patient	0.524298	0.418231
Patient	0.452684	0.385485
Patient	0.320026	0.326106
Patient	0.358899	0.280986
Patient	0.422019	0.418354
Patient	0.360836	0.31899
Patient	0.33284	0.45293
Patient	0.343101	0.306515
Patient	0.311564	0.307965
Patient	0.359475	0.225655
Patient	0.305192	0.270148
Patient	0.326731	0.455549
Patient	0.341915	0.205113
Patient	0.520743	0.45109
Patient	0.415915	0.401037
Patient	0.362356	0.270326
Patient	0.430572	0.410094
Patient	0.34822	0.390989
Patient	0.31125	0.342018
Patient	0.358523	0.427517
Patient	0.316119	0.265363
Patient	0.330104	0.294402
Patient	0.337605	0.439545
Patient	0.312155	0.357999
Patient	0.378167	0.451585
Patient	0.32967	0.331558
Patient	0.398106	0.424115
Patient	0.306325	0.295942
Patient	0.332747	0.315856
Patient	0.332273	0.350958
Patient	0.359044	0.27301
Patient	0.347394	0.240417
Patient	0.32228	0.374926
Patient	0.293125	0.280026
Patient	0.437529	0.263267
Patient	0.327387	0.267157
Control	0.383458	0.502151
Control	0.354796	0.534437
Control	0.371348	0.46956
Control	0.384688	0.470373
Control	0.436665	0.523368
Control	0.516848	0.471693
Control	0.398636	0.496397
Control	0.339869	0.469045
Control	0.425989	0.450567
Control	0.418487	0.525045
Control	0.375388	0.457969
Control	0.313434	0.403839
Control	0.390083	0.62081
Control	0.382328	0.446142
Control	0.415428	0.535746
Control	0.367375	0.47877
Control	0.419771	0.498241
Control	0.447155	0.56611
Control	0.395583	0.454025
Control	0.401549	0.505166
Control	0.378974	0.486581
Control	0.419572	0.582845
