# Supplementary material for: Resting-state alterations in behavioral variant frontotemporal dementia are related to the distribution of monoamine and GABA neurotransmitter systems
Source: eLife. 2024 Jan 15;13:e86085. doi: 10.7554/eLife.86085 (PMC10789488; doi:10.7554/eLife.86085)
Supplement: Figure 2—figure supplement 1—source data 1. [file elife-86085-fig2-figsupp1-data1.xlsx]

## Sheet: Figure 2-figure supplement 1A
Correlations of fALFF with mRNA gene expression of all GABAa subunits (Fisher's z (Spearman's rho))
Patient	GABRA1	GABRA2	GABRA3	GABRA4	GABRA5	GABRA6	GABRB1	GABRB2	GABRB3	GABRG1	GABRG2	GABRG3	GABRR1	GABRR2	GABRR3	GABRD	GABRE	GABRP	GABRQ
1	-0.0246781	-0.0428169	-0.0542662	-0.0667228	0.0707881	-0.0503139	0.0242775	-0.0788017	0.0280704	-0.0671716	0.0248194	-0.0614801	-0.0485426	-0.029144	-0.0252354	0.0157222	0.0511758	0.0289171	-0.052732
2	0.0638282	0.00599883	0.0642833	0.107765	-0.0795823	0.0197554	-0.0841767	0.0905253	-0.111913	0.0492957	0.0278025	-0.046196	-0.0992343	0.065535	0.0424243	0.0310355	-0.0634755	-0.0111297	0.0951834
3	0.0245925	0.088561	-0.248396	-0.195725	0.100442	-0.444886	0.0980644	-0.195331	-0.12664	-0.366815	-0.0690332	-0.105172	-0.165846	0.121599	0.0375441	0.0878568	5.84511e-05	-0.0938451	0.0342975
4	0.0956967	0.0235402	-0.27267	-0.00880155	0.00560092	-0.236764	-0.0458983	-0.180814	-0.2084	-0.23395	-0.130162	-0.0774393	-0.245671	0.0944588	-0.00890524	0.107625	-0.149197	0.00734113	0.0213594
5	0.136972	-0.043156	-0.432976	-0.0426814	0.0513966	-0.446616	-0.0684268	-0.220259	-0.401236	-0.48901	-0.00243374	-0.141385	-0.398448	0.232055	-0.00462848	0.192158	-0.268147	0.097912	0.026026
6	0.0353851	0.0977303	0.0207701	-0.0634597	0.0779598	-0.0714795	0.0915879	-0.0502098	0.0910091	-0.0146474	-0.12142	-0.00466445	0.0554418	-0.0471579	0.0730525	-0.0436652	0.0765968	-0.121545	0.0464174
7	0.179484	0.031675	-0.177337	0.0427824	-0.0133218	-0.146949	-0.0404982	-0.113496	-0.140226	-0.140122	-0.0824964	0.00353786	-0.106472	0.0315399	0.0295404	0.0488583	-0.140091	0.0599801	0.088128
8	0.13603	-0.0512701	-0.227014	0.106751	-0.0798743	-0.205584	-0.174827	-0.0204349	-0.40342	-0.250939	0.0609538	-0.029832	-0.317765	0.27869	-0.0194084	0.198388	-0.219814	0.0546645	0.0712922
9	-0.0492251	0.257607	-0.00173703	-0.111688	0.0738363	-0.0192322	0.222858	-0.166192	0.296729	0.0181833	-0.183747	-0.0611661	-0.0253028	-0.0032303	0.0610563	0.0165366	0.255525	-0.135256	-0.0348135
10	0.106876	-0.0874957	-0.259556	0.0910569	-0.0850345	-0.260225	-0.197412	-0.0120833	-0.476745	-0.296353	0.0781078	0.0556748	-0.268965	0.250533	-0.0595405	0.166735	-0.324658	0.0786004	-0.00975524
11	0.107887	-0.0808293	-0.294698	0.162086	-0.162676	-0.242811	-0.304809	0.0271777	-0.600472	-0.317747	0.142354	-0.041349	-0.314653	0.307147	-0.0667611	0.19003	-0.382036	0.132943	0.0140873
12	0.0656423	-0.0837545	-0.129064	0.154443	-0.128983	-0.097729	-0.0931748	0.0902104	-0.268119	-0.129814	0.150909	0.0391307	-0.0329246	0.134279	-0.0324207	0.102787	-0.308227	0.185401	0.00812343
13	0.0222935	0.191898	0.0877425	-0.127219	0.104277	-0.0541162	0.200597	-0.119939	0.18793	0.0290941	-0.274058	-0.0431908	-0.15434	0.0237745	0.077735	0.0773495	0.219575	-0.320932	0.0493367
14	-0.0173825	0.0860334	-0.145931	-0.36085	0.390671	-0.232696	0.243999	-0.400102	0.324613	-0.207065	-0.306752	0.001459	-0.117927	-0.00730456	0.129827	0.00735748	0.345312	-0.234547	-0.0237561
15	-0.00880952	0.0303802	-0.0907315	-0.159693	0.232237	-0.0778124	0.0760582	-0.198297	0.178709	-0.0849742	-0.237569	-0.0517202	-0.0728829	-0.0276101	0.06422	-0.0188918	0.200913	-0.155275	0.00428597
16	0.0260227	-0.0032648	-0.341273	-0.120348	0.107083	-0.252088	-0.0331812	-0.293295	-0.138356	-0.319173	-0.0606452	-0.15827	-0.221046	0.0850233	-0.0295338	0.125242	-0.0381061	0.0111031	-0.0594109
17	0.0136284	0.137254	-0.0686812	-0.152343	0.102628	-0.181001	0.230769	-0.174547	0.172433	-0.118512	-0.142433	-0.0254888	-0.0304949	-0.0138654	0.0102333	0.0298189	0.170583	-0.111053	-0.00933792
18	-0.0435348	0.178567	0.160509	0.0545671	-0.164171	0.1428	0.114805	0.139227	0.246558	0.184826	-0.0269274	-0.0285078	0.198232	-0.0697741	0.0409771	-0.0924695	0.120529	-0.0561542	0.0506363
19	0.133527	-0.031841	-0.313725	-0.0364687	-0.0408053	-0.235781	-0.0413752	-0.198063	-0.278846	-0.244675	-0.0772407	-0.0812201	-0.206011	0.109488	0.0238083	0.100349	-0.14773	0.135052	-0.000462049
20	0.0434582	0.0546325	-0.0152643	-0.105943	0.0322497	-0.169811	0.19201	-0.0543531	0.0489281	-0.0849933	-0.123153	-0.0603195	-0.0308629	0.0738395	0.028925	0.102635	0.0625228	-0.0902621	0.0452967
21	-0.162515	0.00509996	0.100378	-0.0638698	0.0396531	0.200212	0.0125592	0.027428	0.239882	0.151678	-0.000386416	0.0229561	0.272802	-0.117179	-0.0475865	-0.136521	0.132271	0.00649982	-0.135012
22	0.0476297	-0.12277	0.0126392	0.121873	-0.0672986	0.097522	-0.214096	0.103417	-0.19455	0.0377112	0.151775	0.0117282	-0.0783796	0.00735623	-0.0507134	0.00799538	-0.140211	0.058856	-0.0530256
23	0.0814028	0.0124685	-0.148558	0.0694621	0.0186069	-0.148285	-0.121493	-0.0896515	-0.264227	-0.169498	-0.0619903	0.121128	-0.257793	0.179069	-0.0685233	0.124723	-0.151468	-0.0497749	-0.0157003
24	0.197853	-0.0052583	-0.0877059	0.144727	-0.0998808	-0.153508	-0.139262	0.0176674	-0.347523	-0.137621	0.0342881	0.000222857	-0.465568	0.274225	0.00567606	0.208013	-0.220655	-0.0568149	0.0978763
25	0.108254	0.00425163	-0.149638	0.090029	-0.0511141	-0.131376	-0.110874	-0.0520767	-0.236523	-0.129877	-0.064647	0.0134799	-0.208576	0.0941502	-0.0236521	0.0862327	-0.174822	-0.0424871	0.00702291
26	-0.105438	0.179585	0.165041	-0.267061	0.253684	0.00222739	0.368248	-0.118712	0.424917	0.113168	-0.22227	-0.0332749	-0.0340141	-0.0827013	0.0518034	0.00505132	0.411192	-0.36412	-0.0331003
27	0.0660658	0.0230599	-0.213454	0.104605	-0.031763	-0.211823	-0.127963	-0.0617897	-0.30452	-0.239029	-0.0358453	-0.0190943	-0.551652	0.330581	-0.0143834	0.239027	-0.132336	-0.137245	-0.0287306
28	0.182677	-0.168301	-0.421201	0.0225853	0.063873	-0.382474	-0.223703	-0.223419	-0.478444	-0.447251	0.0842515	0.0236352	-0.307795	0.168981	-0.0333319	0.121408	-0.327414	0.213936	0.0222286
29	0.0674811	0.0018584	-0.487588	-0.105262	0.0494329	-0.502401	-0.0332434	-0.249233	-0.265359	-0.519573	-0.0120151	-0.0824579	-0.267885	0.204334	0.00315023	0.154914	-0.138705	0.046819	-0.0271871
30	0.0102665	-0.0123774	0.0436139	0.0731942	0.0456335	0.103135	-0.115428	-0.0609627	0.0166038	0.0923853	-0.0903964	0.17263	-0.0362652	-0.016177	0.0159212	0.000819637	0.0320586	-0.0634211	-0.0280118
31	-0.0124573	0.211444	0.107838	-0.158647	0.137574	0.0693518	0.225664	-0.119513	0.425852	0.138978	-0.250511	0.0131154	0.031857	-0.162576	0.0986788	-0.109439	0.341069	-0.228153	0.0752013
32	0.0887418	-0.0240973	-0.339007	0.073189	-0.032098	-0.290627	-0.169093	-0.122277	-0.366233	-0.370861	0.121509	-0.0352035	-0.380338	0.2636	-0.0265204	0.20293	-0.238677	0.097949	-0.00501128
33	0.0769098	-0.0606457	-0.122048	0.101064	-0.0260908	-0.00884811	-0.113687	0.0071802	-0.267236	-0.0649748	0.0900636	-0.00528233	-0.234348	0.151895	-0.0309307	0.151299	-0.166426	0.0933833	-0.0441477
34	0.101623	-0.08848	-0.104786	0.307432	-0.261815	-0.0571679	-0.304347	0.148536	-0.496009	-0.0970079	0.16368	0.147561	-0.19796	0.223268	-0.105207	0.160308	-0.401826	0.139945	0.00205405
35	0.141765	-0.00568286	-0.19586	0.0848849	-0.192267	-0.180863	-0.140255	0.023227	-0.392744	-0.229451	0.145024	-0.101887	-0.173841	0.151353	0.0312227	0.159959	-0.246797	0.134782	0.090102
36	-0.0161145	0.124532	0.278388	-0.0283938	0.0193884	0.0814727	0.141379	0.0916499	0.133376	0.167373	-0.0862651	-0.0142277	0.0109002	-0.0495614	0.0922327	0.00365205	0.164564	-0.232002	0.0912747
37	-0.0221839	0.091092	-0.165452	-0.0178807	0.0722373	-0.140216	0.00963444	-0.158472	0.00269697	-0.150034	-0.148388	0.0383771	-0.270201	0.114091	-0.0152922	0.0986388	0.00965778	-0.207377	-0.0914112
38	0.0809195	-0.0874994	-0.175123	0.0942449	-0.119929	-0.141302	-0.169492	0.0579769	-0.382162	-0.187178	0.122982	-0.0244207	-0.115649	0.127113	-0.0964046	0.111392	-0.335704	0.135011	-0.0205323
39	0.00397015	0.0516941	-0.137294	-0.0950213	0.0758501	-0.0529922	0.0256419	-0.157754	0.0558917	-0.0587157	-0.133682	-0.0458795	0.0933997	-0.0852289	0.00453161	-0.0576543	-0.0226458	0.0684534	-0.0200488
40	0.127612	-0.120395	-0.344037	0.0300226	-0.01736	-0.301178	-0.179104	-0.115162	-0.443583	-0.344733	0.0520831	-0.00593749	-0.29036	0.22414	-0.0982241	0.187554	-0.318697	0.0683697	0.0089271
41	0.111804	-0.00261494	-0.123963	0.132737	-0.19663	-0.163704	-0.118893	0.058757	-0.353561	-0.157617	0.185802	0.0301854	-0.148481	0.157756	-0.0290854	0.156	-0.29138	0.114637	0.0358256
42	0.0364278	0.0248125	0.00836345	-0.0211569	0.0456542	-0.0415706	0.0280584	-0.01248	-0.0631021	-0.013113	-0.0548691	0.0337396	-0.0744726	-0.00228103	0.0521699	0.0648809	0.0131259	-0.0776851	0.034686
43	-0.0766246	0.0814357	0.233466	0.0831308	-0.229773	0.18291	0.0348015	0.271955	0.0732652	0.225056	0.106696	-0.0544717	0.136467	-0.0817482	-0.00320055	-0.0522037	0.0151533	-0.0701255	0.027192
44	0.121066	-0.120443	-0.315615	0.0574397	0.0413223	-0.278744	-0.202472	-0.163546	-0.422663	-0.335923	0.0254809	-0.0102233	-0.372481	0.185498	-0.0635001	0.145137	-0.267061	0.0856756	-0.0376116
45	0.0992852	0.131398	-0.296812	-0.113406	0.110106	-0.356672	0.178586	-0.286572	0.0480533	-0.327666	-0.176313	-0.0238829	-0.130801	0.0842488	0.0806104	0.0866127	0.0155337	-0.0206347	0.0830463
46	0.120213	0.109737	-0.429346	-0.295041	0.29472	-0.571026	0.188258	-0.491017	-0.0400623	-0.539147	-0.267642	-0.224835	-0.399215	0.230007	0.15253	0.178118	0.122338	-0.0957904	0.0797464
47	0.0504653	0.116025	-0.123607	-0.0694568	-0.0686269	-0.211581	0.0415066	-0.0216029	-0.125427	-0.186931	-0.0411366	-0.167844	-0.129793	0.102927	0.0322479	0.0462562	-0.0615275	-0.0390754	0.0487856
48	0.118708	-0.0227564	0.005748	-0.0690582	0.0519107	-0.105247	0.0498816	0.0449117	-0.128613	-0.0803902	0.106447	-0.0261671	-0.0304186	0.0234729	0.0484995	0.0553495	-0.0452456	0.104531	0.116226
49	0.0246767	0.0506087	-0.26642	-0.109587	0.117035	-0.318397	0.0396674	-0.185696	-0.12337	-0.3214	-0.0489335	-0.0427382	-0.186459	0.169865	0.0543249	0.0977096	-0.0687485	-0.0241113	-0.00279836
50	0.0678808	-0.0436699	-0.263292	0.0284133	-0.0250176	-0.219826	-0.136619	-0.119632	-0.336505	-0.250589	-0.0663073	0.00376855	-0.332007	0.220216	-0.0205009	0.157392	-0.193282	-0.00368268	0.0443796
51	0.161647	-0.0466907	-0.240687	0.112337	-0.0450237	-0.212772	-0.202159	-0.0313429	-0.439847	-0.255271	0.10361	-0.0433909	-0.442178	0.261144	-0.0124808	0.228297	-0.243217	0.0610266	0.0618123
52	0.099432	-0.036975	-0.358028	-0.0669662	0.115682	-0.356773	-0.0541508	-0.244086	-0.274613	-0.379438	-0.0651012	-0.0108605	-0.316044	0.215514	-0.000505198	0.159311	-0.111819	-0.0322385	-0.00663558

## Sheet: Figure 2-figure supplement 1B
	Correlation matrix of fALFF-mRNA correlations for all GABAa subunits (Fisher's z (Spearman's rho))
	GABRA1	GABRA2	GABRA3	GABRA4	GABRA5	GABRA6	GABRB1	GABRB2	GABRB3	GABRG1	GABRG2	GABRG3	GABRR1	GABRR2	GABRR3	GABRD	GABRE	GABRP	GABRQ
GABRA1	1	-0.00245623	-0.146276	0.118915	-0.137997	0.395868	-0.144741	0.336215	-0.0349577	-0.243015	-0.0700303	0.0343315	0.0090798	0.179144	0.0556453	0.304529	-0.189273	0.123461	-0.118486
GABRA2	-0.00245623	1	0.325739	-0.222584	0.687721	-0.0187138	0.667777	0.147783	0.802516	0.344827	0.211628	0.438215	-0.146	-0.0526175	-0.106018	0.0713857	0.0221542	0.00415875	0.177349
GABRA3	-0.146276	0.325739	1	-0.626711	0.513043	-0.480682	0.602525	-0.322964	0.461358	0.466469	0.460633	0.136926	0.104936	-0.00473904	0.0118757	-0.398066	0.468209	0.0802085	0.673599
GABRA4	0.118915	-0.222584	-0.626711	1	-0.39853	0.395074	-0.555122	0.350803	-0.3317	-0.38509	-0.30893	-0.202843	0.000631459	0.0212636	0.114566	0.40165	-0.325096	-0.151862	-0.568759
GABRA5	-0.137997	0.687721	0.513043	-0.39853	1	-0.306098	0.650493	0.112621	0.869389	0.28259	0.289833	0.360244	-0.147684	-0.105727	-0.142091	0.043344	0.162054	-0.0981896	0.266781
GABRA6	0.395868	-0.0187138	-0.480682	0.395074	-0.306098	1	-0.333736	0.529746	-0.108909	-0.419935	-0.236526	0.0698499	-0.13562	0.268196	-0.0144622	0.474426	-0.349347	0.23266	-0.428582
GABRB1	-0.144741	0.667777	0.602525	-0.555122	0.650493	-0.333736	1	-0.218278	0.692052	0.615764	0.332139	0.459421	-0.057032	-0.115696	-0.0756899	-0.294077	0.351281	0.000649985	0.566743
GABRB2	0.336215	0.147783	-0.322964	0.350803	0.112621	0.529746	-0.218278	1	0.20944	-0.428546	-0.00581437	0.202626	-0.223571	0.12426	-0.15646	0.691773	-0.382365	-0.0444759	-0.508845
GABRB3	-0.0349577	0.802516	0.461358	-0.3317	0.869389	-0.108909	0.692052	0.20944	1	0.280509	0.293987	0.466635	-0.197988	-0.0343652	-0.185878	0.13013	0.0673006	-0.0262583	0.204491
GABRG1	-0.243015	0.344827	0.466469	-0.38509	0.28259	-0.419935	0.615764	-0.428546	0.280509	1	0.238026	0.223742	-0.0152789	-0.087092	-0.0257007	-0.504736	0.431242	0.00547625	0.468579
GABRG2	-0.0700303	0.211628	0.460633	-0.30893	0.289833	-0.236526	0.332139	-0.00581437	0.293987	0.238026	1	0.2262	0.0439181	-0.0370128	0.0185858	-0.233196	0.26295	0.00765237	0.39153
GABRG3	0.0343315	0.438215	0.136926	-0.202843	0.360244	0.0698499	0.459421	0.202626	0.466635	0.223742	0.2262	1	-0.283356	-0.0742298	-0.179766	-0.0575558	0.229108	-0.01411	0.0681315
GABRR1	0.0090798	-0.146	0.104936	0.000631459	-0.147684	-0.13562	-0.057032	-0.223571	-0.197988	-0.0152789	0.0439181	-0.283356	1	0.149001	0.423361	-0.116359	0.0935106	0.0343222	0.214288
GABRR2	0.179144	-0.0526175	-0.00473904	0.0212636	-0.105727	0.268196	-0.115696	0.12426	-0.0343652	-0.087092	-0.0370128	-0.0742298	0.149001	1	0.080696	0.136326	-0.032662	0.533244	0.0196208
GABRR3	0.0556453	-0.106018	0.0118757	0.114566	-0.142091	-0.0144622	-0.0756899	-0.15646	-0.185878	-0.0257007	0.0185858	-0.179766	0.423361	0.080696	1	-0.056819	0.0407934	0.00965766	0.0567376
GABRD	0.304529	0.0713857	-0.398066	0.40165	0.043344	0.474426	-0.294077	0.691773	0.13013	-0.504736	-0.233196	-0.0575558	-0.116359	0.136326	-0.056819	1	-0.461773	-0.0269307	-0.498025
GABRE	-0.189273	0.0221542	0.468209	-0.325096	0.162054	-0.349347	0.351281	-0.382365	0.0673006	0.431242	0.26295	0.229108	0.0935106	-0.032662	0.0407934	-0.461773	1	0.000446703	0.50474
GABRP	0.123461	0.00415875	0.0802085	-0.151862	-0.0981896	0.23266	0.000649985	-0.0444759	-0.0262583	0.00547625	0.00765237	-0.01411	0.0343222	0.533244	0.00965766	-0.0269307	0.000446703	1	0.151955
GABRQ	-0.118486	0.177349	0.673599	-0.568759	0.266781	-0.428582	0.566743	-0.508845	0.204491	0.468579	0.39153	0.0681315	0.214288	0.0196208	0.0567376	-0.498025	0.50474	0.151955	1
