# Supplementary material for: Resting-state alterations in behavioral variant frontotemporal dementia are related to the distribution of monoamine and GABA neurotransmitter systems
Source: eLife. 2024 Jan 15;13:e86085. doi: 10.7554/eLife.86085 (PMC10789488; doi:10.7554/eLife.86085)
Supplement: Figure 2—source data 1. [file elife-86085-fig2-data1.xlsx]

## Sheet: Figure2A
Correlations of fALFF with neurotransmitter maps (Fisher's z (Spearman's rho))
Patient	5-HT1a	5-HT1b	5-HT2a	5-HTT	D1	D2	DAT	FDOPA	GABAa	MU	NET
1	0.112007	-0.132942	0.00169353	0.196171	0.0386222	0.208759	0.289231	0.25191	0.0562049	0.00440399	0.247105
2	0.107318	-0.0161858	-0.266957	0.0048068	0.0757495	0.082901	-0.0978487	-0.00171342	-0.38751	0.416423	-0.208115
3	-0.299155	-0.226915	-0.197802	-0.254843	-0.162011	-0.200835	-0.212206	-0.259698	-0.079189	-0.216124	-0.476514
4	0.118511	-0.350537	-0.118106	-0.494993	-0.239086	-0.065254	-0.36904	-0.483927	-0.160069	0.0255566	-0.388997
5	0.115156	-0.385172	-0.233865	0.265475	0.165147	0.235464	0.396991	0.229306	-0.145325	-0.0179297	-0.0393605
6	-0.177235	0.145003	0.0723562	-0.459625	-0.191405	-0.321644	-0.554378	-0.492326	0.0333757	-0.0990981	-0.35061
7	0.230988	-0.176699	0.11822	-0.494228	-0.189568	-0.116848	-0.397453	-0.447969	0.196282	-0.021794	-0.389585
8	0.129274	-0.320254	-0.352966	0.111444	0.0752131	0.222896	0.129089	0.0743359	-0.373266	0.329225	-0.230569
9	0.125718	-0.381623	-0.0371236	-0.0862532	-0.10006	-0.123153	0.0140752	-0.182346	0.104698	-0.328545	-0.150338
10	0.00395377	-0.411846	-0.310273	0.091349	-0.134589	0.0557879	0.128908	0.0530111	-0.2244	-0.125562	-0.263491
11	0.0214595	-0.197284	-0.444639	0.269122	0.191104	0.280655	0.288331	0.204433	-0.528229	0.341203	-0.266935
12	0.207599	-0.331557	-0.226935	0.419236	-0.0156584	0.127961	0.420407	0.447335	-0.117119	-0.0892648	0.362502
13	-0.228873	-0.50694	-0.414886	-0.396756	-0.424565	-0.282922	-0.409571	-0.34755	-0.332	-0.273518	-0.338937
14	-0.364	-0.061929	0.134232	-0.325205	-0.286646	-0.301467	-0.177909	-0.0243131	0.17454	-0.585976	0.154718
15	-0.0903658	0.112887	0.036136	-0.420967	-0.356763	-0.43159	-0.553541	-0.305149	-0.023904	-0.0079384	0.0596801
16	-0.1866	-0.260217	-0.195661	-0.106887	0.027176	-0.140666	-0.0684547	-0.141321	-0.150334	0.0374981	-0.418619
17	-0.00575537	-0.24006	0.0699838	-0.0528269	-0.200285	-0.115517	0.0776059	0.0648703	0.22874	-0.560081	0.021174
18	0.181006	-0.129298	-0.132128	-0.182053	-0.136569	-0.222234	-0.245346	-0.35804	-0.0708265	0.144756	-0.484267
19	-0.0972549	-0.211575	-0.136995	-0.114711	-0.135787	-0.123572	-0.0966947	-0.177875	0.0475118	-0.0970314	-0.239897
20	0.0836912	-0.4001	0.00958098	0.182375	-0.130534	-0.0138117	0.268764	0.286612	0.0932355	-0.501904	0.325894
21	-0.321043	0.219314	-0.0572486	-0.137107	-0.100838	-0.203502	-0.234275	-0.117832	-0.0862916	0.156899	-0.0556127
22	0.0763571	0.164772	-0.237792	0.241766	0.29162	0.149955	0.15146	0.131393	-0.329733	0.619255	-0.190883
23	-0.201827	0.0849495	-0.0132454	0.143627	0.0981936	0.0815024	0.174371	0.121611	0.120341	-0.184622	-0.0943757
24	0.101036	-0.327208	-0.354323	0.209665	-0.185417	0.240504	0.245656	0.320688	-0.441309	0.109066	0.110616
25	0.0349643	-0.302892	-0.13794	-0.397982	-0.349943	-0.30983	-0.424689	-0.424513	-0.119338	-0.187843	-0.483204
26	-0.2598	-0.486119	-0.19717	-0.162091	-0.237393	-0.172256	0.00675495	-0.063255	-0.0182878	-0.475459	-0.164089
27	-0.0941186	-0.474065	-0.510108	0.241844	-0.176442	0.108768	0.198014	0.336946	-0.478477	-0.157099	0.111159
28	0.0760987	-0.119685	0.00377354	0.12602	-0.058964	0.037305	0.0646551	0.187273	0.0133008	-0.167429	0.320415
29	-0.30899	-0.4015	-0.321268	0.00580693	-0.0861708	-0.0364343	0.0806802	-0.0120011	-0.211372	-0.177265	-0.170228
30	-0.107319	0.189549	0.143451	-0.529793	-0.289093	-0.438422	-0.811886	-0.599687	0.0839777	-0.0620249	-0.136689
31	0.0732898	0.20976	0.268718	-0.392737	-0.23998	-0.237365	-0.411939	-0.308645	0.255918	-0.147419	-0.090135
32	-0.0237512	-0.365589	-0.348497	0.326332	0.120034	0.309976	0.478418	0.346399	-0.330719	0.119422	-0.0385707
33	0.277673	-0.154788	0.0628932	0.462008	0.194163	0.372753	0.48021	0.382333	0.0635396	-0.233348	0.236266
34	0.17631	-0.28856	-0.326959	0.137732	-0.063427	0.328046	0.121553	0.0772635	-0.368183	0.167444	-0.108153
35	-0.00609649	-0.191327	-0.271983	0.179516	0.243788	0.168732	0.213936	0.0554138	-0.267193	0.271165	-0.282364
36	-0.240152	-0.11329	-0.148308	-0.0594081	-0.214332	0.0240018	-0.0467427	0.102212	-0.138549	-0.325803	0.0816573
37	-0.0686842	-0.591642	-0.276	-0.230621	-0.445141	-0.313844	-0.189133	-0.221325	-0.199936	-0.515306	-0.270866
38	0.072607	-0.175473	-0.256658	0.0173379	0.0899971	0.110984	0.0172663	-0.0729362	-0.290396	0.22265	-0.433392
39	0.131677	0.0645384	0.211305	-0.622877	-0.183212	-0.172573	-0.65688	-0.717963	0.174632	0.056946	-0.50566
40	-0.117391	-0.291641	-0.378465	0.163143	0.00702336	0.0123351	0.0447644	0.0272232	-0.381166	0.0252729	-0.20315
41	0.015155	-0.362223	-0.250363	0.206193	0.147914	0.220706	0.328697	0.127971	-0.14992	-0.0772824	-0.267092
42	-0.179436	-0.209267	-0.108545	0.00510075	0.0410655	0.0466379	0.034025	0.0612127	-0.00871032	-0.386651	0.0794042
43	0.199848	-0.2225	-0.201575	0.127696	0.239024	0.196859	0.135449	0.0665901	-0.247879	0.252616	-0.356471
44	0.0860496	-0.085547	0.0234888	0.134816	0.140569	0.101247	0.0873604	0.0480115	-0.00993211	0.107148	-0.138408
45	0.118493	-0.143416	0.077061	0.0146923	-0.0657227	-0.195389	0.123022	0.0445468	0.161557	-0.268763	0.173219
46	-0.285004	-0.367766	-0.242593	0.0140978	0.00519058	-0.0790179	0.0946548	0.0564842	-0.081026	-0.248604	-0.0204873
47	-0.236611	-0.261902	-0.568077	-0.0044504	0.0840717	-0.0788911	0.0209488	-0.0667547	-0.432382	0.179848	-0.506581
48	0.0614312	0.0165672	-0.0646732	0.315397	0.153072	0.241075	0.315801	0.356483	-0.0804601	-0.0665516	0.139298
49	-0.451286	-0.251727	-0.313153	-0.191179	-0.0557224	-0.212722	-0.139189	-0.261036	-0.170728	-0.214369	-0.349004
50	-0.0587909	-0.462556	-0.385434	-0.0719302	-0.207426	-0.0248688	0.0189296	-0.0373098	-0.340014	-0.0877843	-0.142248
51	0.0597751	-0.416909	-0.407148	0.393229	0.130302	0.366694	0.518989	0.44072	-0.429184	0.167554	-0.0279853
52	-0.231084	-0.589103	-0.381797	0.0435231	-0.0818168	-0.125658	0.150707	0.0504271	-0.135152	-0.359014	-0.17627

## Sheet: Figure2B
Correlations of GMV with neurotransmitter maps (Fisher's z (Spearman's rho))
Patient	5-HT1a	5-HT1b	5-HT2a	5-HTT	D1	D2	DAT	FDOPA	GABAa	MU	NET
1	-0.0387566	-0.205033	-0.493038	0.258256	0.183741	0.475817	0.302264	0.241825	-0.60405	0.634079	-0.113577
2	-0.0799154	0.113125	-0.0703313	0.0292928	0.179978	0.116996	-0.000995213	0.00983735	-0.199709	0.439713	-0.151286
3	-0.189893	0.0794735	0.247118	-0.257558	-0.0879501	-0.411018	-0.190874	-0.229683	0.420377	-0.457876	-0.127842
4	-0.133738	-0.471501	-0.247962	-0.138278	-0.364589	-0.0686158	-0.0270774	0.0413554	-0.21577	-0.489993	0.0503344
5	0.0173702	-0.00763304	0.034413	-0.0218639	0.16544	-0.0774279	-0.00954459	-0.0162238	0.0847937	-0.00925748	0.0967871
6	-0.0968684	-0.126508	-0.27704	-0.126898	0.0173963	0.188376	-0.0829967	-0.174411	-0.39623	0.185268	-0.244879
7	0.173505	0.0373569	0.276806	0.0186889	0.122328	-0.0738866	0.0295095	-0.04056	0.377036	-0.217044	-0.05603
8	-0.282383	-0.232549	-0.187131	-0.184543	-0.164803	-0.185881	-0.0850317	-0.11855	-0.0381199	-0.17469	-0.257084
9	-0.319336	-0.104963	0.0901565	-0.70993	-0.434684	-0.623141	-0.569498	-0.69543	0.168988	-0.545926	-0.205511
10	-0.0559756	-0.203295	-0.203479	0.0266801	0.115508	0.139133	0.032418	-0.0686248	-0.163774	0.0946107	-0.20173
11	-0.382351	0.413793	0.0231396	-0.0830134	-0.0645349	-0.416265	-0.0846649	-0.0751311	-0.00200662	0.123798	-0.0777225
12	0.112638	0.0144881	-0.124975	0.303137	0.285175	0.17791	0.167196	0.266241	-0.119258	0.160362	0.20275
13	-0.0438129	-0.558413	-0.245446	-0.0489874	-0.297351	-0.0727757	0.0444489	0.0555557	-0.223927	-0.308177	0.104411
14	0.178971	-0.0707053	0.293886	-0.148922	-0.229526	-0.201952	-0.0837383	-0.0481119	0.337725	-0.440208	0.0665272
15	-0.0979341	0.0840293	0.128777	0.0940804	0.0428689	-0.0693753	0.122938	0.00698109	0.220441	-0.102034	0.219068
16	-0.432627	0.0293898	0.0488098	-0.35376	-0.402056	-0.422401	-0.266931	-0.196542	0.0796353	-0.332703	0.202901
17	-0.169182	-0.0996477	-0.113518	0.215961	0.132745	0.129595	0.303062	0.230805	0.0355434	-0.319484	0.193766
18	-0.28074	0.141166	-0.102552	-0.16259	-0.0137966	-0.479213	-0.23845	-0.311774	0.00858134	0.154875	-0.440723
19	-0.406752	-0.0278002	-0.141811	-0.453134	-0.242732	-0.507822	-0.3596	-0.334005	-0.0657379	-0.317998	-0.305068
20	0.122888	-0.299351	-0.0988842	0.0951215	-0.159353	0.0319459	0.154123	0.23141	-0.164326	-0.291811	0.18524
21	-0.199139	0.408181	0.0558453	0.0197406	0.0787091	-0.158907	-0.073614	-0.00959939	0.0254175	0.292642	0.084047
22	0.0679292	-0.131706	-0.298077	0.4554	0.239746	0.385507	0.414077	0.430554	-0.346431	0.216003	0.360796
23	0.320591	-0.0124982	0.0783252	0.205014	-0.109239	0.137441	0.163323	0.288653	0.055347	0.0368956	0.300393
24	-0.0102377	-0.0932078	-0.298368	0.268543	0.239275	0.126983	0.261752	0.273329	-0.333995	0.342207	-0.0275263
25	-0.207372	-0.242145	-0.228725	-0.300011	-0.219342	0.00300815	-0.22228	-0.0765853	-0.25705	0.0945329	-0.187944
26	-0.239731	-0.237715	0.0357976	-0.347427	-0.436134	-0.398769	-0.233711	-0.116913	0.0679389	-0.846337	0.262949
27	-0.437582	-0.170997	-0.360201	0.384326	0.174184	0.108456	0.458581	0.504803	-0.304341	-0.0254861	0.248569
28	0.414299	-0.18389	0.00675308	0.186807	0.24039	0.416797	0.121646	0.0389881	-0.00744215	0.173095	-0.156819
29	-0.186265	-0.0865578	-0.0195561	0.115515	0.013868	0.014893	0.194204	0.212385	-0.0239172	-0.288917	0.203043
30	-0.169622	-0.183638	-0.17237	-0.4654	-0.265373	-0.247256	-0.440015	-0.429798	-0.139408	0.193229	-0.504013
31	0.108773	-0.225445	-0.0790271	0.0619576	0.219293	0.0725378	0.0411413	-0.0148339	-0.00154972	-0.155012	-0.262864
32	-0.0659495	-0.211593	0.13957	-0.34066	-0.319638	-0.172926	-0.147207	-0.206599	0.156972	-0.40927	0.0273129
33	0.0473023	0.228527	0.0806831	-0.420076	-0.0808012	-0.205986	-0.569484	-0.499291	-0.0141969	0.342613	-0.131996
34	0.236214	0.238256	0.261909	0.351436	0.451333	0.251037	0.366687	0.165324	0.308299	0.253985	-0.114005
35	0.0609147	-0.0569693	0.0382235	-0.0921046	0.0909605	-0.147897	-0.00487114	-0.233356	0.134249	-0.0958174	-0.199934
36	0.341565	-0.0647371	0.038341	0.57808	0.479724	0.357449	0.555568	0.472171	0.161718	0.00577447	0.0753383
37	-0.364823	-0.182175	-0.330423	0.043762	-0.246199	-0.184529	0.0445483	0.177583	-0.226729	-0.212334	0.105051
38	-0.571604	-0.185921	-0.491813	0.00702699	0.0293287	-0.0658435	0.0949241	0.0910384	-0.407593	0.162439	-0.122396
39	0.164446	0.423452	0.570239	-0.471871	-0.12573	-0.335745	-0.487238	-0.584347	0.503329	0.0137078	-0.0532885
40	-0.198949	-0.285215	-0.445178	0.142091	-0.1051	0.158002	0.19123	0.324027	-0.59982	0.0444875	0.0610913
41	-0.0314109	-0.411701	-0.228369	-0.276795	-0.274074	-0.124201	-0.204648	-0.095824	-0.245359	-0.275769	-0.204238
42	0.0712823	-0.451873	-0.338666	0.16699	0.0843951	0.454588	0.280071	0.219034	-0.361813	0.075099	0.0132938
43	0.190207	-0.55917	-0.0286493	-0.232094	-0.344606	-0.0333517	-0.11883	-0.145699	0.0074406	-0.543112	-0.0846858
44	0.156738	-0.0611632	0.163241	0.194124	0.0993675	0.111129	0.185434	0.146248	0.121452	-0.292118	0.297907
45	-0.23098	-0.0538541	0.0177314	-0.548255	-0.576194	-0.495236	-0.499308	-0.391382	0.00242868	-0.382907	-0.0164544
46	-0.211194	0.0180497	0.210276	-0.231259	-0.313396	-0.443369	-0.176608	-0.0922852	0.239368	-0.653505	0.296373
47	-0.249521	-0.359682	-0.22085	-0.353881	-0.417622	-0.398076	-0.292133	-0.205927	-0.170206	-0.562288	-0.163851
48	-0.00107038	-0.156293	-0.15582	0.376679	0.211156	0.328524	0.464532	0.422592	-0.139714	-0.0739125	0.293438
49	-0.338138	-0.369025	-0.349387	-0.522506	-0.517852	-0.359089	-0.423571	-0.406621	-0.281846	-0.31139	-0.284497
50	0.129217	-0.298618	-0.12245	-0.0993514	-0.229549	0.047086	-0.0984866	-0.0765001	-0.135992	-0.113847	0.0283088
51	-0.061471	-0.184173	0.137154	-0.150868	-0.345746	-0.24988	-0.112833	-0.00858258	0.132195	-0.68324	0.0731154
52	-0.224062	-0.307672	-0.510512	0.215339	0.0573325	0.0677972	0.219944	0.304748	-0.519719	0.154739	0.0390573

## Sheet: Figure2C-F
Correlations of fALFF-neurotransmitter correlations with Verbal Fluency (VF) and Mini Mental State Exam (MMSE)
Patient	NET Fisher's z (Spearman's rho)	VF Score	MMSE Score
1	0.247105	21	26
2	-0.208115	18	28
3	-0.476514	11	20
4	-0.388997	6	22
5	-0.0393605	15	29
6	-0.35061	9	24
7	-0.389585	14	28
8	-0.230569	5	21
9	-0.150338	11	21
10	-0.263491	0	8
11	-0.266935	7	27
12	0.362502	20	30
13	-0.338937	8	22
14	0.154718
15	0.0596801		24
16	-0.418619	3	16
17	0.021174	33	30
18	-0.484267	9	27
19	-0.239897	7	28
20	0.325894	10	29
21	-0.0556127	17	30
22	-0.190883	12	28
23	-0.0943757	9	18
24	0.110616	9	26
25	-0.483204	5	19
26	-0.164089	8	21
27	0.111159	25	27
28	0.320415	15	28
29	-0.170228	3	19
30	-0.136689	5	23
31	-0.090135	13	28
32	-0.0385707	16	26
33	0.236266	15	30
34	-0.108153	15	25
35	-0.282364	19	27
36	0.0816573	12	28
37	-0.270866	16	29
38	-0.433392	10	19
39	-0.50566	12	22
40	-0.20315	22	30
41	-0.267092	20	30
42	0.0794042	20	29
43	-0.356471	11	25
44	-0.138408	10	28
45	0.173219
46	-0.0204873	21	28
47	-0.506581	15	29
48	0.139298	6	25
49	-0.349004	3	24
50	-0.142248	9	23
51	-0.0279853	11	26
52	-0.17627	8	29
Spearman's rho NET	-	0.371914	0.379735
p-value NET	-	0.00850537	0.00652972

## Sheet: Figure2G
Correlations of fALFF with mRNA gene expression (Fisher's z (Spearman's rho))
Patient	HTR1B (5-HT1b)	HTR2A (5-HT2a)	GABRA1 (GABAa)	GABRB1 (GABAa)	GABRG1 (GABAa)	SLC6A2 (NET)
1	0.0373969	-0.00803023	-0.0428169	-0.0788017	0.0248194	-0.0246781
2	-0.0224856	-0.000958659	0.00599883	0.0905253	0.0278025	0.0638282
3	-0.144173	-0.104022	0.088561	-0.195331	-0.0690332	0.0245925
4	-0.0633521	-0.0449838	0.0235402	-0.180814	-0.130162	0.0956967
5	-0.0758626	-0.132235	-0.043156	-0.220259	-0.00243374	0.136972
6	0.0073759	0.00933699	0.0977303	-0.0502098	-0.12142	0.0353851
7	-0.0533598	0.0843227	0.031675	-0.113496	-0.0824964	0.179484
8	0.0366082	-0.124282	-0.0512701	-0.0204349	0.0609538	0.13603
9	-0.0825304	0.00100841	0.257607	-0.166192	-0.183747	-0.0492251
10	0.0293059	-0.130098	-0.0874957	-0.0120833	0.0781078	0.106876
11	-0.0121644	-0.204327	-0.0808293	0.0271777	0.142354	0.107887
12	-0.0603373	-0.02633	-0.0837545	0.0902104	0.150909	0.0656423
13	-0.104839	0.00160191	0.191898	-0.119939	-0.274058	0.0222935
14	0.0266606	0.0727796	0.0860334	-0.400102	-0.306752	-0.0173825
15	0.0273513	0.0127287	0.0303802	-0.198297	-0.237569	-0.00880952
16	-0.00810828	-0.0984277	-0.0032648	-0.293295	-0.0606452	0.0260227
17	-0.0773626	0.0071982	0.137254	-0.174547	-0.142433	0.0136284
18	-0.133037	0.00825637	0.178567	0.139227	-0.0269274	-0.0435348
19	0.000217579	-0.0169772	-0.031841	-0.198063	-0.0772407	0.133527
20	-0.0998777	0.0318617	0.0546325	-0.0543531	-0.123153	0.0434582
21	0.0198233	0.0258015	0.00509996	0.027428	-0.000386416	-0.162515
22	0.0775438	-0.0958747	-0.12277	0.103417	0.151775	0.0476297
23	0.0704292	-0.0455158	0.0124685	-0.0896515	-0.0619903	0.0814028
24	-0.0597464	-0.0678665	-0.0052583	0.0176674	0.0342881	0.197853
25	-0.0200424	-0.0518231	0.00425163	-0.0520767	-0.064647	0.108254
26	-0.0852988	0.0850008	0.179585	-0.118712	-0.22227	-0.105438
27	-0.0240764	-0.19984	0.0230599	-0.0617897	-0.0358453	0.0660658
28	0.0565395	-0.0221446	-0.168301	-0.223419	0.0842515	0.182677
29	-0.0828608	-0.14089	0.0018584	-0.249233	-0.0120151	0.0674811
30	0.158589	0.0558038	-0.0123774	-0.0609627	-0.0903964	0.0102665
31	-0.0692154	0.124565	0.211444	-0.119513	-0.250511	-0.0124573
32	-0.022849	-0.134779	-0.0240973	-0.122277	0.121509	0.0887418
33	0.0738612	-0.0741153	-0.0606457	0.0071802	0.0900636	0.0769098
34	0.0276583	-0.115752	-0.08848	0.148536	0.16368	0.101623
35	-0.0609169	-0.0837385	-0.00568286	0.023227	0.145024	0.141765
36	-0.0801194	0.0415054	0.124532	0.0916499	-0.0862651	-0.0161145
37	-0.0382851	-0.0816491	0.091092	-0.158472	-0.148388	-0.0221839
38	-0.00942735	-0.153089	-0.0874994	0.0579769	0.122982	0.0809195
39	0.00160196	0.0454729	0.0516941	-0.157754	-0.133682	0.00397015
40	0.0598927	-0.0827756	-0.120395	-0.115162	0.0520831	0.127612
41	-0.0799614	-0.0756034	-0.00261494	0.058757	0.185802	0.111804
42	0.0683608	-0.0221635	0.0248125	-0.01248	-0.0548691	0.0364278
43	-0.159456	-0.0528759	0.0814357	0.271955	0.106696	-0.0766246
44	0.0682696	-0.0900322	-0.120443	-0.163546	0.0254809	0.121066
45	-0.112746	0.0696237	0.131398	-0.286572	-0.176313	0.0992852
46	-0.120431	-0.0813099	0.109737	-0.491017	-0.267642	0.120213
47	-0.15951	-0.0867437	0.116025	-0.0216029	-0.0411366	0.0504653
48	-0.0418998	0.0486122	-0.0227564	0.0449117	0.106447	0.118708
49	0.0109074	-0.0975477	0.0506087	-0.185696	-0.0489335	0.0246767
50	-0.0160985	-0.0985261	-0.0436699	-0.119632	-0.0663073	0.0678808
51	0.016129	-0.102533	-0.0466907	-0.0313429	0.10361	0.161647
52	0.0366326	-0.0858541	-0.036975	-0.244086	-0.0651012	0.099432
