# Supplementary material for: Resting-state alterations in behavioral variant frontotemporal dementia are related to the distribution of monoamine and GABA neurotransmitter systems
Source: eLife. 2024 Jan 15;13:e86085. doi: 10.7554/eLife.86085 (PMC10789488; doi:10.7554/eLife.86085)
Supplement: Figure 3—figure supplement 1—source data 1. [file elife-86085-fig3-figsupp1-data1.xlsx]

## Sheet: Figure 3-figure supplement 1A
Correlations of GABAa neurotransmitter map with mRNA gene expression of all GABAa subunits (Fisher's z (Spearman's rho))
GABRA1	GABRA2	GABRA3	GABRA4	GABRA5	GABRA6	GABRB1	GABRB2	GABRB3	GABRG1	GABRG2	GABRG3	GABRR1	GABRR2	GABRR3	GABRD	GABRE	GABRP	GABRQ
-0.0524867	0.733108	0.0857123	0.0161239	0.637037	0.0434513	0.210769	0.942632	0.673317	-0.0574318	0.324178	0.904003	-0.500986	-0.315772	-0.259787	0.434271	-0.219508	-0.152892	-0.29426
0.129931	0.447058	0.0992617	0.0469777	0.456618	0.134057	0.223863	0.998211	0.662861	-0.0669015	-0.0657289	0.536606	-0.556484	0.345621	-0.701765	0.480574	-0.173638	-0.0228734	-0.342349
-0.15254	0.28178	-0.223878	-0.0114594	0.381506	0.185988	0.120995	0.63287	0.367934	0.0310595	0.568571	0.565633	-0.285544	-0.053025	0.0171752	0.0745765	0.181212	-0.0130711	-0.215707
0.335537	0.313425	-7.35082e-05	-0.34687	0.515871	0.445138	0.13818	0.532688	0.489789	0.0374218	-0.222289	0.628186	-0.603768	0.281928	-0.205484	0.293919	-0.0348853	0.263259	-0.517039
0.161022	0.371597	-0.294849	0.206532	0.472245	0.481059	0.100853	0.700917	0.579355	-0.41011	-0.000344262	0.504862	-0.231885	-0.0159954	-0.0546218	0.434414	-0.204868	-0.25782	-0.365916
0.429653	0.534056	0.00996874	0.0147362	0.378697	0.360599	0.0487533	0.481752	0.430221	-0.31255	-0.0799458	0.444037	-0.214106	-0.0822153	-0.273379	0.286679	-0.0697602	0.0671933	-0.230791

## Sheet: Figure 3-figure supplement 1B
Autocorrelations of mRNA gene expression maps of all GABAa subunits (Fisher's z (Spearman's rho))
GABRA1	GABRA2	GABRA3	GABRA4	GABRA5	GABRA6	GABRB1	GABRB2	GABRB3	GABRG1	GABRG2	GABRG3	GABRR1	GABRR2	GABRR3	GABRD	GABRE	GABRP	GABRQ
0.14104	1.03057	0.844124	0.210497	1.73811	0.502816	1.45416	1.35775	1.41283	0.895768	0.581189	0.939928	0.448978	0.152168	0.215598	1.52572	0.76882	0.292649	1.02515
0.220967	1.05076	0.920476	0.622959	1.38567	0.317559	1.38183	1.3578	1.23744	0.824207	0.748761	0.946391	0.274391	0.19142	-0.0361815	1.08876	0.747417	0.0805572	1.11237
-0.0355522	0.972058	1.06596	0.584205	1.37386	0.24712	1.55416	1.03462	1.36924	0.836782	0.398259	0.908442	0.36593	0.0654775	0.164	1.45092	0.790917	0.0177569	1.24207
-0.0276158	0.980301	0.896117	0.756706	1.63892	0.537412	1.38383	1.35676	1.13654	0.510822	0.493392	0.9987	0.24394	0.240833	0.151978	1.41169	0.86921	0.134803	1.17026
0.0617775	0.943791	0.908871	0.688849	1.39348	0.401205	1.54848	1.38598	1.12576	0.45693	0.318027	0.927611	0.174184	0.0361933	0.00233669	1.39057	0.860664	-0.0751772	1.19446
0.189913	1.13639	0.742167	0.434578	1.59667	0.620723	1.59863	1.15975	1.31611	0.837386	0.71456	0.776844	0.21068	-0.0589578	-0.0183432	1.01319	0.909325	0.276899	0.955536
0.30857	1.12911	0.826266	0.399293	1.71722	0.373422	1.60883	1.12236	1.63968	0.783662	1.18097	0.908795	0.450534	0.0867265	0.295899	1.35184	0.990747	0.00295785	1.06814
0.271403	1.24469	0.900806	0.396821	1.77511	0.566732	1.6403	1.14936	1.44622	0.855401	1.00489	1.10393	0.191252	0.207277	0.104341	1.36849	1.11113	-0.130404	1.03931
0.436004	1.00781	0.88376	0.503499	1.62294	0.630555	1.48579	1.27378	1.35919	0.781838	0.835759	1.15846	0.275966	-0.0360225	0.376489	1.35181	1.09208	-0.111149	0.942676
0.226207	1.24087	1.04021	1.08456	1.55126	0.593448	1.60048	1.18359	1.15726	0.890366	0.549516	0.74155	0.278047	-0.20351	0.009397	1.21798	1.06674	0.0426866	1.32978
0.210938	1.09302	1.14936	0.956875	1.52721	0.625153	1.66587	1.32144	1.12172	0.573465	0.518574	0.887261	0.196313	0.0285685	-0.0248113	1.04343	0.953376	-0.0472557	1.01339
0.187937	1.15581	0.981721	0.902187	1.41213	0.73163	1.55536	1.48123	1.17994	0.613016	0.549534	0.780922	0.296826	0.209343	-0.122825	1.30143	0.881825	0.185894	1.28818
0.182516	1.29367	1.00403	0.755635	2.00641	0.734601	1.63712	1.15449	1.25372	0.611749	0.746194	1.15529	0.262292	-0.0235766	0.20248	1.45057	1.0717	-0.029463	1.20514
0.39145	0.913331	0.851221	0.862335	1.80171	0.675329	1.56126	1.26366	1.13072	0.566047	0.79256	0.993871	0.4066	0.0207461	0.173085	1.39372	1.07695	-0.0684897	1.41007
0.378835	0.886241	1.02206	1.27743	1.80528	0.797217	1.75812	1.40464	1.20378	1.33845	0.709617	1.25043	0.275487	0.118127	0.0342436	1.35334	1.27001	0.13871	1.14811
										8
										9
										9
										9
										9
										9
										9
										9
										9
										9
										9
										9
										9
										9
										9
										9
										10
										10
										10
										10
										10
										10
										10
										10
										10
										10
										10
										10
										10
										10
										10
										11
										11
										11
										11
										11
										11
										11
										11
										11
										11
										11
										11
										11
										11
										11
										12
										12
										12
										12
										12
										12
										12
										12
										12
										12
										12
										12
										12
										12
										12
										13
										13
										13
										13
										13
										13
										13
										13
										13
										13
										13
										13
										13
										13
										13
										14
										14
										14
										14
										14
										14
										14
										14
										14
										14
										14
										14
										14
										14
										14
										15
										15
										15
										15
										15
										15
										15
										15
										15
										15
										15
										15
										15
										15
										15
										16
										16
										16
										16
										16
										16
										16
										16
										16
										16
										16
										16
										16
										16
										16
										17
										17
										17
										17
										17
										17
										17
										17
										17
										17
										17
										17
										17
										17
										17
										18
										18
										18
										18
										18
										18
										18
										18
										18
										18
										18
										18
										18
										18
										18
										19
										19
										19
										19
										19
										19
										19
										19
										19
										19
										19
										19
										19
										19
										19
