# Supplementary material for: Resting-state alterations in behavioral variant frontotemporal dementia are related to the distribution of monoamine and GABA neurotransmitter systems
Source: eLife. 2024 Jan 15;13:e86085. doi: 10.7554/eLife.86085 (PMC10789488; doi:10.7554/eLife.86085)
Supplement: Figure 3—source data 1. [file elife-86085-fig3-data1.xlsx]

## Sheet: Figure3A
ROC curve bvFTD vs. HC (fALFF-neurotransmitter correlations)
5-HT1b			5-HT2a			GABAa			NET
1-Specificity	Sensitivity	AUC	1-Specificity	Sensitivity	AUC	1-Specificity	Sensitivity	AUC	1-Specificity	Sensitivity	AUC
1	1	0.736888	1	1	0.711538	1	1	0.683566	1	1	0.673077
0.980769	1		0.980769	1		0.980769	1		0.980769	1
0.961538	1		0.961538	1		0.961538	1		0.961538	1
0.942308	1		0.961538	0.954545		0.942308	1		0.961538	0.954545
0.923077	1		0.942308	0.954545		0.923077	1		0.942308	0.954545
0.903846	1		0.923077	0.954545		0.903846	1		0.923077	0.954545
0.884615	1		0.903846	0.954545		0.884615	1		0.903846	0.954545
0.884615	0.954545		0.884615	0.954545		0.865385	1		0.884615	0.954545
0.865385	0.954545		0.884615	0.909091		0.846154	1		0.865385	0.954545
0.846154	0.954545		0.865385	0.909091		0.826923	1		0.846154	0.954545
0.826923	0.954545		0.846154	0.909091		0.826923	0.954545		0.826923	0.954545
0.807692	0.954545		0.826923	0.909091		0.807692	0.954545		0.807692	0.954545
0.807692	0.909091		0.807692	0.909091		0.788462	0.954545		0.788462	0.954545
0.788462	0.909091		0.788462	0.909091		0.769231	0.954545		0.769231	0.954545
0.769231	0.909091		0.769231	0.909091		0.75	0.954545		0.75	0.954545
0.75	0.909091		0.75	0.909091		0.75	0.909091		0.75	0.909091
0.75	0.863636		0.75	0.863636		0.730769	0.909091		0.730769	0.909091
0.730769	0.863636		0.730769	0.863636		0.711538	0.909091		0.730769	0.863636
0.711538	0.863636		0.711538	0.863636		0.692308	0.909091		0.730769	0.818182
0.692308	0.863636		0.692308	0.863636		0.673077	0.909091		0.711538	0.818182
0.673077	0.863636		0.673077	0.863636		0.653846	0.909091		0.692308	0.818182
0.653846	0.863636		0.653846	0.863636		0.634615	0.909091		0.673077	0.818182
0.653846	0.818182		0.634615	0.863636		0.615385	0.909091		0.653846	0.818182
0.634615	0.818182		0.615385	0.863636		0.615385	0.863636		0.653846	0.772727
0.615385	0.818182		0.615385	0.818182		0.596154	0.863636		0.634615	0.772727
0.596154	0.818182		0.596154	0.818182		0.576923	0.863636		0.615385	0.772727
0.576923	0.818182		0.576923	0.818182		0.557692	0.863636		0.596154	0.772727
0.576923	0.772727		0.557692	0.818182		0.557692	0.818182		0.576923	0.772727
0.557692	0.772727		0.538462	0.818182		0.538462	0.818182		0.557692	0.772727
0.538462	0.772727		0.519231	0.818182		0.519231	0.818182		0.538462	0.772727
0.519231	0.772727		0.5	0.818182		0.519231	0.772727		0.538462	0.727273
0.5	0.772727		0.480769	0.818182		0.5	0.772727		0.519231	0.727273
0.480769	0.772727		0.461538	0.818182		0.480769	0.772727		0.5	0.727273
0.461538	0.772727		0.461538	0.772727		0.461538	0.772727		0.480769	0.727273
0.442308	0.772727		0.442308	0.772727		0.442308	0.772727		0.461538	0.727273
0.423077	0.772727		0.442308	0.727273		0.423077	0.772727		0.461538	0.681818
0.403846	0.772727		0.423077	0.727273		0.423077	0.727273		0.442308	0.681818
0.384615	0.772727		0.403846	0.727273		0.403846	0.727273		0.423077	0.681818
0.365385	0.772727		0.403846	0.681818		0.403846	0.681818		0.403846	0.681818
0.346154	0.772727		0.384615	0.681818		0.403846	0.636364		0.384615	0.681818
0.326923	0.772727		0.365385	0.681818		0.384615	0.636364		0.365385	0.681818
0.307692	0.772727		0.346154	0.681818		0.365385	0.636364		0.365385	0.636364
0.288462	0.772727		0.346154	0.636364		0.346154	0.636364		0.346154	0.636364
0.269231	0.772727		0.326923	0.636364		0.326923	0.636364		0.326923	0.636364
0.269231	0.727273		0.307692	0.636364		0.307692	0.636364		0.307692	0.636364
0.25	0.727273		0.288462	0.636364		0.288462	0.636364		0.288462	0.636364
0.230769	0.727273		0.288462	0.590909		0.269231	0.636364		0.269231	0.636364
0.211538	0.727273		0.269231	0.590909		0.25	0.636364		0.269231	0.590909
0.211538	0.681818		0.269231	0.545455		0.25	0.590909		0.269231	0.545455
0.211538	0.636364		0.269231	0.5		0.25	0.545455		0.25	0.545455
0.192308	0.636364		0.25	0.5		0.25	0.5		0.230769	0.545455
0.173077	0.636364		0.230769	0.5		0.230769	0.5		0.211538	0.545455
0.173077	0.590909		0.211538	0.5		0.230769	0.454545		0.192308	0.545455
0.173077	0.545455		0.211538	0.454545		0.230769	0.409091		0.192308	0.5
0.153846	0.545455		0.192308	0.454545		0.230769	0.363636		0.192308	0.454545
0.153846	0.5		0.173077	0.454545		0.211538	0.363636		0.192308	0.409091
0.153846	0.454545		0.153846	0.454545		0.192308	0.363636		0.173077	0.409091
0.153846	0.409091		0.134615	0.454545		0.192308	0.318182		0.173077	0.363636
0.153846	0.363636		0.115385	0.454545		0.192308	0.272727		0.173077	0.318182
0.134615	0.363636		0.0961538	0.454545		0.173077	0.272727		0.153846	0.318182
0.134615	0.318182		0.0961538	0.409091		0.153846	0.272727		0.153846	0.272727
0.115385	0.318182		0.0961538	0.363636		0.153846	0.227273		0.134615	0.272727
0.0961538	0.318182		0.0961538	0.318182		0.134615	0.227273		0.134615	0.227273
0.0961538	0.272727		0.0769231	0.318182		0.134615	0.181818		0.134615	0.181818
0.0961538	0.227273		0.0769231	0.272727		0.134615	0.136364		0.115385	0.181818
0.0961538	0.181818		0.0576923	0.272727		0.134615	0.0909091		0.0961538	0.181818
0.0769231	0.181818		0.0384615	0.272727		0.115385	0.0909091		0.0961538	0.136364
0.0576923	0.181818		0.0384615	0.227273		0.0961538	0.0909091		0.0769231	0.136364
0.0384615	0.181818		0.0192308	0.227273		0.0769231	0.0909091		0.0576923	0.136364
0.0384615	0.136364		0.0192308	0.181818		0.0769231	0.0454545		0.0384615	0.136364
0.0192308	0.136364		0.0192308	0.136364		0.0576923	0.0454545		0.0192308	0.136364
0	0.136364		0	0.136364		0.0384615	0.0454545		0.0192308	0.0909091
0	0.0909091		0	0.0909091		0.0192308	0.0454545		0	0.0909091
0	0.0454545		0	0.0454545		0	0.0454545		0	0.0454545
0	0		0	0		0	0		0	0

## Sheet: Figure3B
Correlations of fALFF-neurotransmitter and GMV-neurotransmitter correlations
	5-HT1a			5-HT1b			5-HT2a			5-HTT			D1			D2			DAT			FDOPA			GABAa			MU			NET
Patient	JuSpace fALFF	JuSpace GMV	Spearman's rho	JuSpace fALFF	JuSpace GMV	Spearman's rho	JuSpace fALFF	JuSpace GMV	Spearman's rho	JuSpace fALFF	JuSpace GMV	Spearman's rho	JuSpace fALFF	JuSpace GMV	Spearman's rho	JuSpace fALFF	JuSpace GMV	Spearman's rho	JuSpace fALFF	JuSpace GMV	Spearman's rho	JuSpace fALFF	JuSpace GMV	Spearman's rho	JuSpace fALFF	JuSpace GMV	Spearman's rho	JuSpace fALFF	JuSpace GMV	Spearman's rho	JuSpace fALFF	JuSpace GMV	Spearman's rho
1	0.112007	-0.0387566	0.281824	-0.132942	-0.205033	0.420473	0.00169353	-0.493038	0.337232	0.196171	0.258256	0.367199	0.0386222	0.183741	0.07735	0.208759	0.475817	0.309571	0.289231	0.302264	0.261334	0.25191	0.241825	0.435499	0.0562049	-0.60405	0.315718	0.00440399	0.634079	0.270639	0.247105	-0.113577	0.379322
2	0.107318	-0.0799154		-0.0161858	0.113125		-0.266957	-0.0703313		0.0048068	0.0292928		0.0757495	0.179978		0.082901	0.116996		-0.0978487	-0.000995213		-0.00171342	0.00983735		-0.38751	-0.199709		0.416423	0.439713		-0.208115	-0.151286
3	-0.299155	-0.189893		-0.226915	0.0794735		-0.197802	0.247118		-0.254843	-0.257558		-0.162011	-0.0879501		-0.200835	-0.411018		-0.212206	-0.190874		-0.259698	-0.229683		-0.079189	0.420377		-0.216124	-0.457876		-0.476514	-0.127842
4	0.118511	-0.133738		-0.350537	-0.471501		-0.118106	-0.247962		-0.494993	-0.138278		-0.239086	-0.364589		-0.065254	-0.0686158		-0.36904	-0.0270774		-0.483927	0.0413554		-0.160069	-0.21577		0.0255566	-0.489993		-0.388997	0.0503344
5	0.115156	0.0173702		-0.385172	-0.00763304		-0.233865	0.034413		0.265475	-0.0218639		0.165147	0.16544		0.235464	-0.0774279		0.396991	-0.00954459		0.229306	-0.0162238		-0.145325	0.0847937		-0.0179297	-0.00925748		-0.0393605	0.0967871
6	-0.177235	-0.0968684		0.145003	-0.126508		0.0723562	-0.27704		-0.459625	-0.126898		-0.191405	0.0173963		-0.321644	0.188376		-0.554378	-0.0829967		-0.492326	-0.174411		0.0333757	-0.39623		-0.0990981	0.185268		-0.35061	-0.244879
7	0.230988	0.173505		-0.176699	0.0373569		0.11822	0.276806		-0.494228	0.0186889		-0.189568	0.122328		-0.116848	-0.0738866		-0.397453	0.0295095		-0.447969	-0.04056		0.196282	0.377036		-0.021794	-0.217044		-0.389585	-0.05603
8	0.129274	-0.282383		-0.320254	-0.232549		-0.352966	-0.187131		0.111444	-0.184543		0.0752131	-0.164803		0.222896	-0.185881		0.129089	-0.0850317		0.0743359	-0.11855		-0.373266	-0.0381199		0.329225	-0.17469		-0.230569	-0.257084
9	0.125718	-0.319336		-0.381623	-0.104963		-0.0371236	0.0901565		-0.0862532	-0.70993		-0.10006	-0.434684		-0.123153	-0.623141		0.0140752	-0.569498		-0.182346	-0.69543		0.104698	0.168988		-0.328545	-0.545926		-0.150338	-0.205511
10	0.00395377	-0.0559756		-0.411846	-0.203295		-0.310273	-0.203479		0.091349	0.0266801		-0.134589	0.115508		0.0557879	0.139133		0.128908	0.032418		0.0530111	-0.0686248		-0.2244	-0.163774		-0.125562	0.0946107		-0.263491	-0.20173
11	0.0214595	-0.382351		-0.197284	0.413793		-0.444639	0.0231396		0.269122	-0.0830134		0.191104	-0.0645349		0.280655	-0.416265		0.288331	-0.0846649		0.204433	-0.0751311		-0.528229	-0.00200662		0.341203	0.123798		-0.266935	-0.0777225
12	0.207599	0.112638		-0.331557	0.0144881		-0.226935	-0.124975		0.419236	0.303137		-0.0156584	0.285175		0.127961	0.17791		0.420407	0.167196		0.447335	0.266241		-0.117119	-0.119258		-0.0892648	0.160362		0.362502	0.20275
13	-0.228873	-0.0438129		-0.50694	-0.558413		-0.414886	-0.245446		-0.396756	-0.0489874		-0.424565	-0.297351		-0.282922	-0.0727757		-0.409571	0.0444489		-0.34755	0.0555557		-0.332	-0.223927		-0.273518	-0.308177		-0.338937	0.104411
14	-0.364	0.178971		-0.061929	-0.0707053		0.134232	0.293886		-0.325205	-0.148922		-0.286646	-0.229526		-0.301467	-0.201952		-0.177909	-0.0837383		-0.0243131	-0.0481119		0.17454	0.337725		-0.585976	-0.440208		0.154718	0.0665272
15	-0.0903658	-0.0979341		0.112887	0.0840293		0.036136	0.128777		-0.420967	0.0940804		-0.356763	0.0428689		-0.43159	-0.0693753		-0.553541	0.122938		-0.305149	0.00698109		-0.023904	0.220441		-0.0079384	-0.102034		0.0596801	0.219068
16	-0.1866	-0.432627		-0.260217	0.0293898		-0.195661	0.0488098		-0.106887	-0.35376		0.027176	-0.402056		-0.140666	-0.422401		-0.0684547	-0.266931		-0.141321	-0.196542		-0.150334	0.0796353		0.0374981	-0.332703		-0.418619	0.202901
17	-0.00575537	-0.169182		-0.24006	-0.0996477		0.0699838	-0.113518		-0.0528269	0.215961		-0.200285	0.132745		-0.115517	0.129595		0.0776059	0.303062		0.0648703	0.230805		0.22874	0.0355434		-0.560081	-0.319484		0.021174	0.193766
18	0.181006	-0.28074		-0.129298	0.141166		-0.132128	-0.102552		-0.182053	-0.16259		-0.136569	-0.0137966		-0.222234	-0.479213		-0.245346	-0.23845		-0.35804	-0.311774		-0.0708265	0.00858134		0.144756	0.154875		-0.484267	-0.440723
19	-0.0972549	-0.406752		-0.211575	-0.0278002		-0.136995	-0.141811		-0.114711	-0.453134		-0.135787	-0.242732		-0.123572	-0.507822		-0.0966947	-0.3596		-0.177875	-0.334005		0.0475118	-0.0657379		-0.0970314	-0.317998		-0.239897	-0.305068
20	0.0836912	0.122888		-0.4001	-0.299351		0.00958098	-0.0988842		0.182375	0.0951215		-0.130534	-0.159353		-0.0138117	0.0319459		0.268764	0.154123		0.286612	0.23141		0.0932355	-0.164326		-0.501904	-0.291811		0.325894	0.18524
21	-0.321043	-0.199139		0.219314	0.408181		-0.0572486	0.0558453		-0.137107	0.0197406		-0.100838	0.0787091		-0.203502	-0.158907		-0.234275	-0.073614		-0.117832	-0.00959939		-0.0862916	0.0254175		0.156899	0.292642		-0.0556127	0.084047
22	0.0763571	0.0679292		0.164772	-0.131706		-0.237792	-0.298077		0.241766	0.4554		0.29162	0.239746		0.149955	0.385507		0.15146	0.414077		0.131393	0.430554		-0.329733	-0.346431		0.619255	0.216003		-0.190883	0.360796
23	-0.201827	0.320591		0.0849495	-0.0124982		-0.0132454	0.0783252		0.143627	0.205014		0.0981936	-0.109239		0.0815024	0.137441		0.174371	0.163323		0.121611	0.288653		0.120341	0.055347		-0.184622	0.0368956		-0.0943757	0.300393
24	0.101036	-0.0102377		-0.327208	-0.0932078		-0.354323	-0.298368		0.209665	0.268543		-0.185417	0.239275		0.240504	0.126983		0.245656	0.261752		0.320688	0.273329		-0.441309	-0.333995		0.109066	0.342207		0.110616	-0.0275263
25	0.0349643	-0.207372		-0.302892	-0.242145		-0.13794	-0.228725		-0.397982	-0.300011		-0.349943	-0.219342		-0.30983	0.00300815		-0.424689	-0.22228		-0.424513	-0.0765853		-0.119338	-0.25705		-0.187843	0.0945329		-0.483204	-0.187944
26	-0.2598	-0.239731		-0.486119	-0.237715		-0.19717	0.0357976		-0.162091	-0.347427		-0.237393	-0.436134		-0.172256	-0.398769		0.00675495	-0.233711		-0.063255	-0.116913		-0.0182878	0.0679389		-0.475459	-0.846337		-0.164089	0.262949
27	-0.0941186	-0.437582		-0.474065	-0.170997		-0.510108	-0.360201		0.241844	0.384326		-0.176442	0.174184		0.108768	0.108456		0.198014	0.458581		0.336946	0.504803		-0.478477	-0.304341		-0.157099	-0.0254861		0.111159	0.248569
28	0.0760987	0.414299		-0.119685	-0.18389		0.00377354	0.00675308		0.12602	0.186807		-0.058964	0.24039		0.037305	0.416797		0.0646551	0.121646		0.187273	0.0389881		0.0133008	-0.00744215		-0.167429	0.173095		0.320415	-0.156819
29	-0.30899	-0.186265		-0.4015	-0.0865578		-0.321268	-0.0195561		0.00580693	0.115515		-0.0861708	0.013868		-0.0364343	0.014893		0.0806802	0.194204		-0.0120011	0.212385		-0.211372	-0.0239172		-0.177265	-0.288917		-0.170228	0.203043
30	-0.107319	-0.169622		0.189549	-0.183638		0.143451	-0.17237		-0.529793	-0.4654		-0.289093	-0.265373		-0.438422	-0.247256		-0.811886	-0.440015		-0.599687	-0.429798		0.0839777	-0.139408		-0.0620249	0.193229		-0.136689	-0.504013
31	0.0732898	0.108773		0.20976	-0.225445		0.268718	-0.0790271		-0.392737	0.0619576		-0.23998	0.219293		-0.237365	0.0725378		-0.411939	0.0411413		-0.308645	-0.0148339		0.255918	-0.00154972		-0.147419	-0.155012		-0.090135	-0.262864
32	-0.0237512	-0.0659495		-0.365589	-0.211593		-0.348497	0.13957		0.326332	-0.34066		0.120034	-0.319638		0.309976	-0.172926		0.478418	-0.147207		0.346399	-0.206599		-0.330719	0.156972		0.119422	-0.40927		-0.0385707	0.0273129
33	0.277673	0.0473023		-0.154788	0.228527		0.0628932	0.0806831		0.462008	-0.420076		0.194163	-0.0808012		0.372753	-0.205986		0.48021	-0.569484		0.382333	-0.499291		0.0635396	-0.0141969		-0.233348	0.342613		0.236266	-0.131996
34	0.17631	0.236214		-0.28856	0.238256		-0.326959	0.261909		0.137732	0.351436		-0.063427	0.451333		0.328046	0.251037		0.121553	0.366687		0.0772635	0.165324		-0.368183	0.308299		0.167444	0.253985		-0.108153	-0.114005
35	-0.00609649	0.0609147		-0.191327	-0.0569693		-0.271983	0.0382235		0.179516	-0.0921046		0.243788	0.0909605		0.168732	-0.147897		0.213936	-0.00487114		0.0554138	-0.233356		-0.267193	0.134249		0.271165	-0.0958174		-0.282364	-0.199934
36	-0.240152	0.341565		-0.11329	-0.0647371		-0.148308	0.038341		-0.0594081	0.57808		-0.214332	0.479724		0.0240018	0.357449		-0.0467427	0.555568		0.102212	0.472171		-0.138549	0.161718		-0.325803	0.00577447		0.0816573	0.0753383
37	-0.0686842	-0.364823		-0.591642	-0.182175		-0.276	-0.330423		-0.230621	0.043762		-0.445141	-0.246199		-0.313844	-0.184529		-0.189133	0.0445483		-0.221325	0.177583		-0.199936	-0.226729		-0.515306	-0.212334		-0.270866	0.105051
38	0.072607	-0.571604		-0.175473	-0.185921		-0.256658	-0.491813		0.0173379	0.00702699		0.0899971	0.0293287		0.110984	-0.0658435		0.0172663	0.0949241		-0.0729362	0.0910384		-0.290396	-0.407593		0.22265	0.162439		-0.433392	-0.122396
39	0.131677	0.164446		0.0645384	0.423452		0.211305	0.570239		-0.622877	-0.471871		-0.183212	-0.12573		-0.172573	-0.335745		-0.65688	-0.487238		-0.717963	-0.584347		0.174632	0.503329		0.056946	0.0137078		-0.50566	-0.0532885
40	-0.117391	-0.198949		-0.291641	-0.285215		-0.378465	-0.445178		0.163143	0.142091		0.00702336	-0.1051		0.0123351	0.158002		0.0447644	0.19123		0.0272232	0.324027		-0.381166	-0.59982		0.0252729	0.0444875		-0.20315	0.0610913
41	0.015155	-0.0314109		-0.362223	-0.411701		-0.250363	-0.228369		0.206193	-0.276795		0.147914	-0.274074		0.220706	-0.124201		0.328697	-0.204648		0.127971	-0.095824		-0.14992	-0.245359		-0.0772824	-0.275769		-0.267092	-0.204238
42	-0.179436	0.0712823		-0.209267	-0.451873		-0.108545	-0.338666		0.00510075	0.16699		0.0410655	0.0843951		0.0466379	0.454588		0.034025	0.280071		0.0612127	0.219034		-0.00871032	-0.361813		-0.386651	0.075099		0.0794042	0.0132938
43	0.199848	0.190207		-0.2225	-0.55917		-0.201575	-0.0286493		0.127696	-0.232094		0.239024	-0.344606		0.196859	-0.0333517		0.135449	-0.11883		0.0665901	-0.145699		-0.247879	0.0074406		0.252616	-0.543112		-0.356471	-0.0846858
44	0.0860496	0.156738		-0.085547	-0.0611632		0.0234888	0.163241		0.134816	0.194124		0.140569	0.0993675		0.101247	0.111129		0.0873604	0.185434		0.0480115	0.146248		-0.00993211	0.121452		0.107148	-0.292118		-0.138408	0.297907
45	0.118493	-0.23098		-0.143416	-0.0538541		0.077061	0.0177314		0.0146923	-0.548255		-0.0657227	-0.576194		-0.195389	-0.495236		0.123022	-0.499308		0.0445468	-0.391382		0.161557	0.00242868		-0.268763	-0.382907		0.173219	-0.0164544
46	-0.285004	-0.211194		-0.367766	0.0180497		-0.242593	0.210276		0.0140978	-0.231259		0.00519058	-0.313396		-0.0790179	-0.443369		0.0946548	-0.176608		0.0564842	-0.0922852		-0.081026	0.239368		-0.248604	-0.653505		-0.0204873	0.296373
47	-0.236611	-0.249521		-0.261902	-0.359682		-0.568077	-0.22085		-0.0044504	-0.353881		0.0840717	-0.417622		-0.0788911	-0.398076		0.0209488	-0.292133		-0.0667547	-0.205927		-0.432382	-0.170206		0.179848	-0.562288		-0.506581	-0.163851
48	0.0614312	-0.00107038		0.0165672	-0.156293		-0.0646732	-0.15582		0.315397	0.376679		0.153072	0.211156		0.241075	0.328524		0.315801	0.464532		0.356483	0.422592		-0.0804601	-0.139714		-0.0665516	-0.0739125		0.139298	0.293438
49	-0.451286	-0.338138		-0.251727	-0.369025		-0.313153	-0.349387		-0.191179	-0.522506		-0.0557224	-0.517852		-0.212722	-0.359089		-0.139189	-0.423571		-0.261036	-0.406621		-0.170728	-0.281846		-0.214369	-0.31139		-0.349004	-0.284497
50	-0.0587909	0.129217		-0.462556	-0.298618		-0.385434	-0.12245		-0.0719302	-0.0993514		-0.207426	-0.229549		-0.0248688	0.047086		0.0189296	-0.0984866		-0.0373098	-0.0765001		-0.340014	-0.135992		-0.0877843	-0.113847		-0.142248	0.0283088
51	0.0597751	-0.061471		-0.416909	-0.184173		-0.407148	0.137154		0.393229	-0.150868		0.130302	-0.345746		0.366694	-0.24988		0.518989	-0.112833		0.44072	-0.00858258		-0.429184	0.132195		0.167554	-0.68324		-0.0279853	0.0731154
52	-0.231084	-0.224062		-0.589103	-0.307672		-0.381797	-0.510512		0.0435231	0.215339		-0.0818168	0.0573325		-0.125658	0.0677972		0.150707	0.219944		0.0504271	0.304748		-0.135152	-0.519719		-0.359014	0.154739		-0.17627	0.0390573
Spearman's rho (all)	0.309091

## Sheet: Figure3C
Correlations of neurotransmitter maps with mRNA gene expression maps (Fisher's z (Spearman's rho))
Patient	HTR1B (5-HT1b)	HTR2A (5-HT2a)	GABRA1 (GABAa)	GABRB1 (GABAa)	GABRG1 (GABAa)	SLC6A2 (NET)
1	0.0373969	-0.00803023	-0.0428169	-0.0788017	0.0248194	-0.0246781
2	-0.0224856	-0.000958659	0.00599883	0.0905253	0.0278025	0.0638282
3	-0.144173	-0.104022	0.088561	-0.195331	-0.0690332	0.0245925
4	-0.0633521	-0.0449838	0.0235402	-0.180814	-0.130162	0.0956967
5	-0.0758626	-0.132235	-0.043156	-0.220259	-0.00243374	0.136972
6	0.0073759	0.00933699	0.0977303	-0.0502098	-0.12142	0.0353851
7	-0.0533598	0.0843227	0.031675	-0.113496	-0.0824964	0.179484
8	0.0366082	-0.124282	-0.0512701	-0.0204349	0.0609538	0.13603
9	-0.0825304	0.00100841	0.257607	-0.166192	-0.183747	-0.0492251
10	0.0293059	-0.130098	-0.0874957	-0.0120833	0.0781078	0.106876
11	-0.0121644	-0.204327	-0.0808293	0.0271777	0.142354	0.107887
12	-0.0603373	-0.02633	-0.0837545	0.0902104	0.150909	0.0656423
13	-0.104839	0.00160191	0.191898	-0.119939	-0.274058	0.0222935
14	0.0266606	0.0727796	0.0860334	-0.400102	-0.306752	-0.0173825
15	0.0273513	0.0127287	0.0303802	-0.198297	-0.237569	-0.00880952
16	-0.00810828	-0.0984277	-0.0032648	-0.293295	-0.0606452	0.0260227
17	-0.0773626	0.0071982	0.137254	-0.174547	-0.142433	0.0136284
18	-0.133037	0.00825637	0.178567	0.139227	-0.0269274	-0.0435348
19	0.000217579	-0.0169772	-0.031841	-0.198063	-0.0772407	0.133527
20	-0.0998777	0.0318617	0.0546325	-0.0543531	-0.123153	0.0434582
21	0.0198233	0.0258015	0.00509996	0.027428	-0.000386416	-0.162515
22	0.0775438	-0.0958747	-0.12277	0.103417	0.151775	0.0476297
23	0.0704292	-0.0455158	0.0124685	-0.0896515	-0.0619903	0.0814028
24	-0.0597464	-0.0678665	-0.0052583	0.0176674	0.0342881	0.197853
25	-0.0200424	-0.0518231	0.00425163	-0.0520767	-0.064647	0.108254
26	-0.0852988	0.0850008	0.179585	-0.118712	-0.22227	-0.105438
27	-0.0240764	-0.19984	0.0230599	-0.0617897	-0.0358453	0.0660658
28	0.0565395	-0.0221446	-0.168301	-0.223419	0.0842515	0.182677
29	-0.0828608	-0.14089	0.0018584	-0.249233	-0.0120151	0.0674811
30	0.158589	0.0558038	-0.0123774	-0.0609627	-0.0903964	0.0102665
31	-0.0692154	0.124565	0.211444	-0.119513	-0.250511	-0.0124573
32	-0.022849	-0.134779	-0.0240973	-0.122277	0.121509	0.0887418
33	0.0738612	-0.0741153	-0.0606457	0.0071802	0.0900636	0.0769098
34	0.0276583	-0.115752	-0.08848	0.148536	0.16368	0.101623
35	-0.0609169	-0.0837385	-0.00568286	0.023227	0.145024	0.141765
36	-0.0801194	0.0415054	0.124532	0.0916499	-0.0862651	-0.0161145
37	-0.0382851	-0.0816491	0.091092	-0.158472	-0.148388	-0.0221839
38	-0.00942735	-0.153089	-0.0874994	0.0579769	0.122982	0.0809195
39	0.00160196	0.0454729	0.0516941	-0.157754	-0.133682	0.00397015
40	0.0598927	-0.0827756	-0.120395	-0.115162	0.0520831	0.127612
41	-0.0799614	-0.0756034	-0.00261494	0.058757	0.185802	0.111804
42	0.0683608	-0.0221635	0.0248125	-0.01248	-0.0548691	0.0364278
43	-0.159456	-0.0528759	0.0814357	0.271955	0.106696	-0.0766246
44	0.0682696	-0.0900322	-0.120443	-0.163546	0.0254809	0.121066
45	-0.112746	0.0696237	0.131398	-0.286572	-0.176313	0.0992852
46	-0.120431	-0.0813099	0.109737	-0.491017	-0.267642	0.120213
47	-0.15951	-0.0867437	0.116025	-0.0216029	-0.0411366	0.0504653
48	-0.0418998	0.0486122	-0.0227564	0.0449117	0.106447	0.118708
49	0.0109074	-0.0975477	0.0506087	-0.185696	-0.0489335	0.0246767
50	-0.0160985	-0.0985261	-0.0436699	-0.119632	-0.0663073	0.0678808
51	0.016129	-0.102533	-0.0466907	-0.0313429	0.10361	0.161647
52	0.0366326	-0.0858541	-0.036975	-0.244086	-0.0651012	0.099432

## Sheet: Figure3D
Autocorrelations of mRNA gene expression (Fisher's z (Spearman's rho))
HTR1B (5-HT1b)	HTR2A (5-HT2a)	GABRA1 (GABAa)	GABRB1 (GABAa)	GABRG1 (GABAa)	SLC6A2 (NET)				1
0.224487	0.163064	0.14104	1.45416	0.895768	0.414649
0.213734	-0.0435527	0.220967	1.38183	0.824207	0.0803217
0.290723	-0.0859384	-0.0355522	1.55416	0.836782	0.280914
0.241733	-0.0733084	-0.0276158	1.38383	0.510822	0.14864
0.150068	-0.234759	0.0617775	1.54848	0.45693	0.162095
0.106139	0.170222	0.189913	1.59863	0.837386	0.27015
0.395184	-0.0366442	0.30857	1.60883	0.783662	0.305541
0.216676	-0.17107	0.271403	1.6403	0.855401	0.201158
0.566046	-0.122153	0.436004	1.48579	0.781838	0.0743631
0.0541349	-0.0992501	0.226207	1.60048	0.890366	0.0280894
0.145727	-0.0161733	0.210938	1.66587	0.573465	0.161707
0.0557175	0.316308	0.187937	1.55536	0.613016	0.204657
0.165151	0.289234	0.182516	1.63712	0.611749	0.214694
0.408925	0.278998	0.39145	1.56126	0.566047	0.319452
0.218192	0.434605	0.378835	1.75812	1.33845	0.422769
